# Supplementary material for: How can functional annotations be derived from profiles of phenotypic annotations?
Source: Springer Nature journal article supplement (doi:10.1186/s12859-017-1503-5), 2017-02-10

Figure S2. Distribution of functional similarity in GO versus phenotypic similarity (and vice versa) for different levels of sparsity.

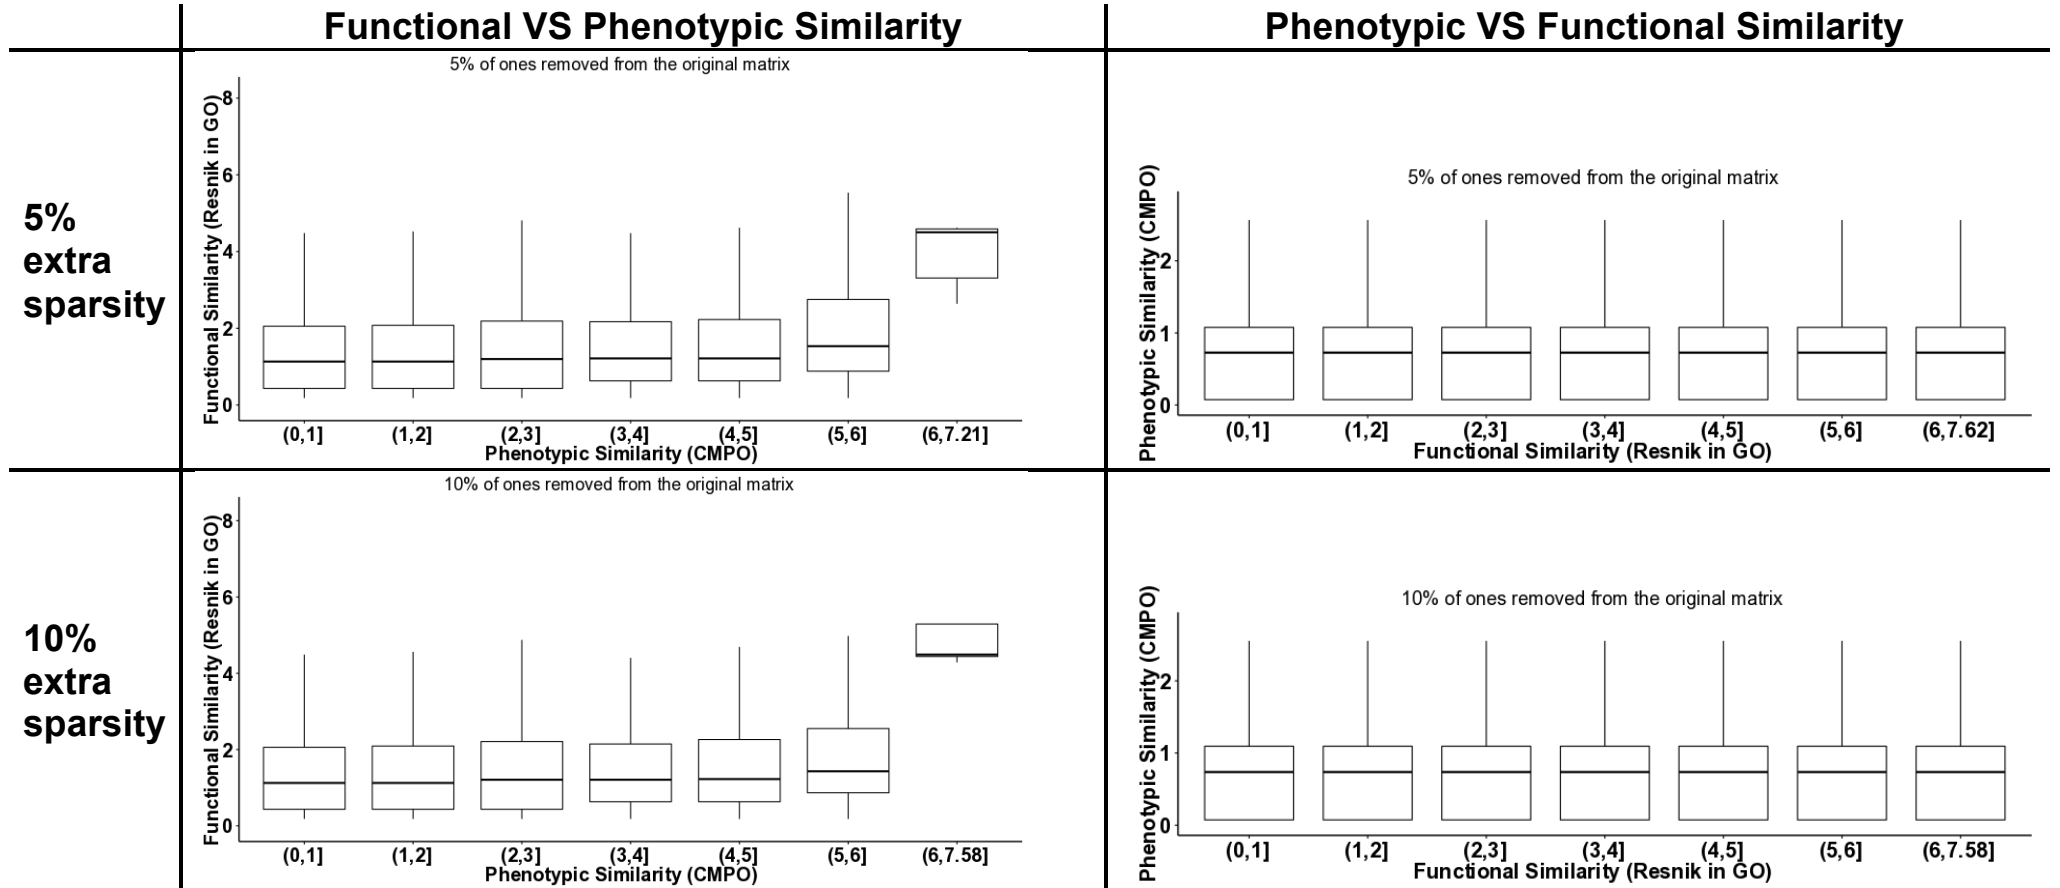

**20%  
extra  
sparsity**

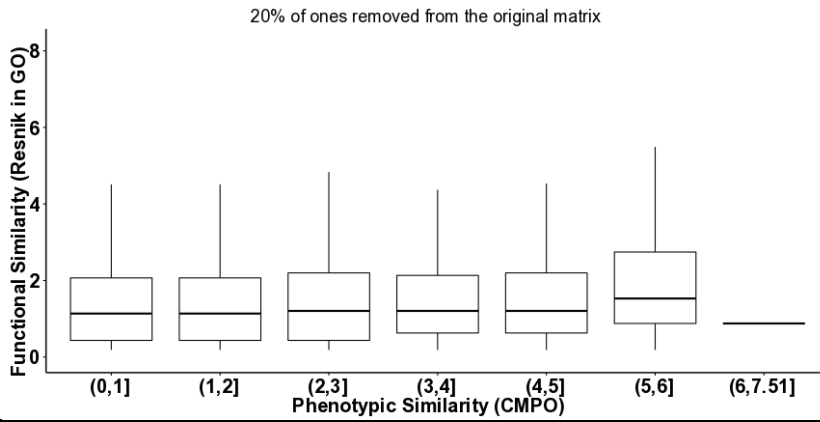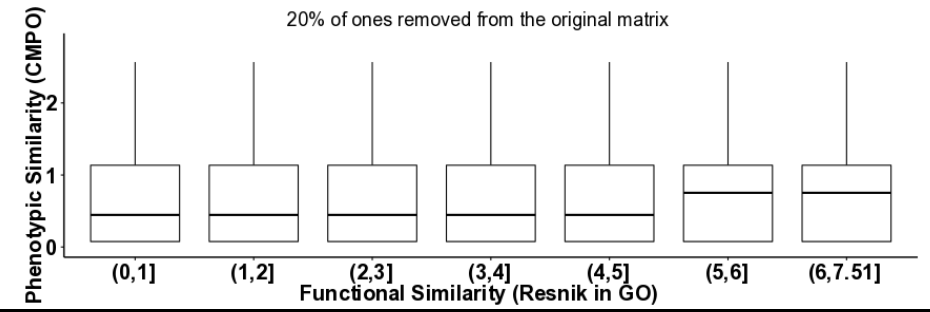

**30%  
extra  
sparsity**

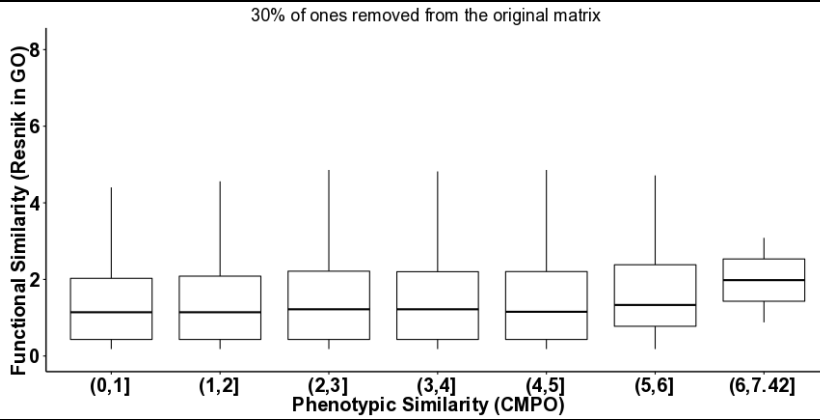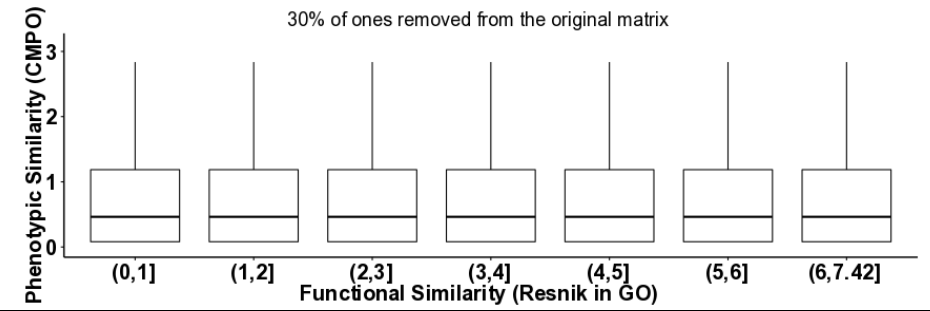

Supplement: MOESM5 [file 12859_2017_1503_MOESM5_ESM.pdf]
