# Supplementary material for: How can functional annotations be derived from profiles of phenotypic annotations?
Source: Springer Nature journal article supplement (doi:10.1186/s12859-017-1503-5), 2017-02-10
Supplement: MOESM6 [file 12859_2017_1503_MOESM6_ESM.pdf]

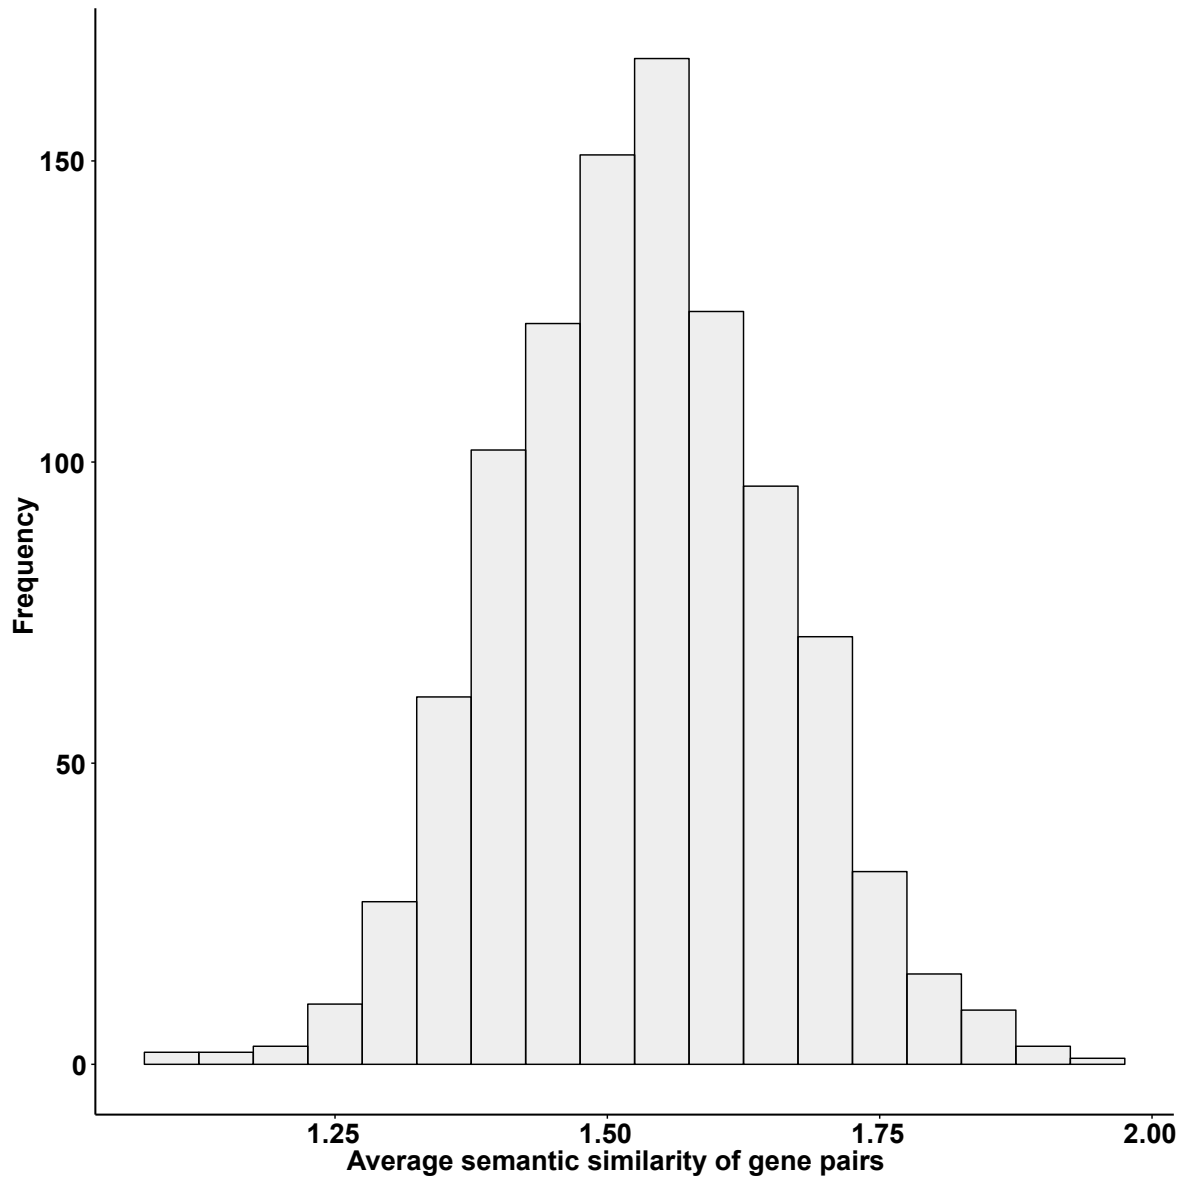

Figure S3. Distribution of average semantic similarities between genes for those pairs with high phenotypic similarity (>6) after random assignment of GO similarity values. The average of the random distribution is lower (1.53) than the one we observed (2.98).
